# Supplementary material for: Multipolar interactions in the D pocket of thrombin: large differences between tricyclic imide and lactam inhibitors
Source: Royal Society of Chemistry journal article supplement (doi:10.1039/b602585d), 2006-01-01
Supplement: b602585d.pdf [file b602585d.pdf]

## Electronic Supplementary Information (ESI)

### **Multipolar Interactions in the D-Pocket of Thrombin: Large Differences between Tricyclic Imide and Lactam Inhibitors<sup>†</sup>**

Eliane Schweizer,<sup>a</sup> Anja Hoffmann-Röder,<sup>b</sup> Jacob A. Olsen,<sup>a</sup> Paul Seiler,<sup>a</sup> Ulrike Obst-Sander,<sup>c</sup>  
Björn Wagner,<sup>c</sup> Manfred Kansy,<sup>c</sup> David W. Banner\*<sup>c</sup> and François Diederich\*<sup>a</sup>

<sup>a</sup> *Laboratorium für Organische Chemie, ETH-Zürich, Hönggerberg HCI, CH-8093 Zürich,  
Switzerland. Fax +41 44 6321109; Tel. +41 44 6322992; E-mail:*

[diederich@org.chem.ethz.ch](mailto:diederich@org.chem.ethz.ch)

<sup>b</sup> *Institut für Organische Chemie, Johannes Gutenberg-Universität, Duesbergweg 10-14, D-  
55128 Mainz, Germany.*

<sup>c</sup> *Pharma Division, Präklinische Forschung, F. Hoffmann-La Roche AG, CH-4070 Basel,  
Switzerland.*

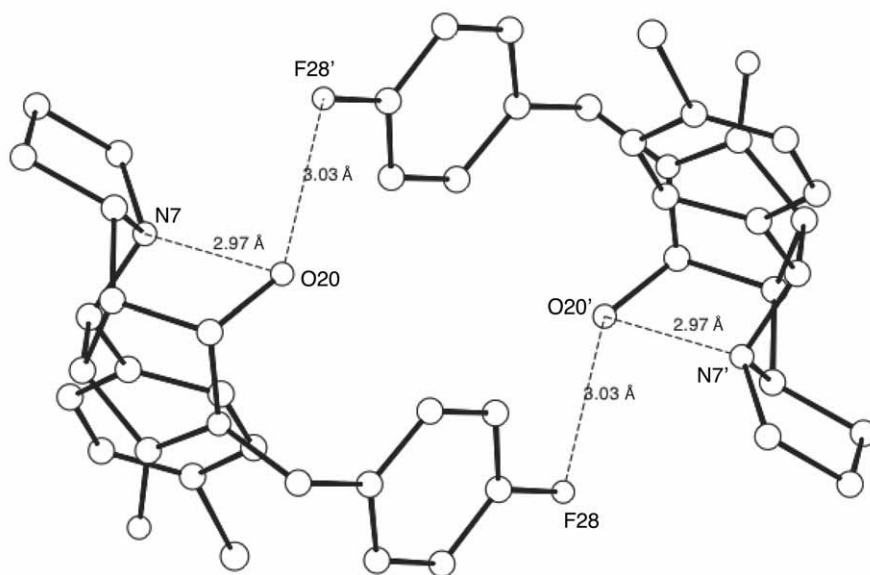

**Figure 1 ESI.** Crystal packing of (±)-**29**, showing short intermolecular F...O and intramolecular O...N distances.

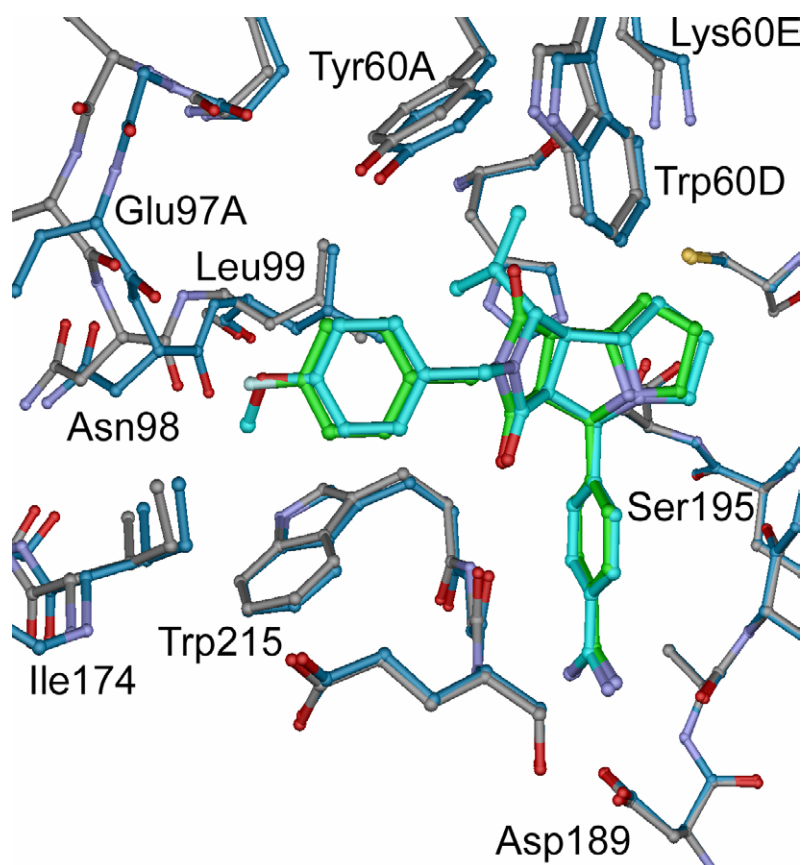

**Figure 2 ESI.** Overlay of the co-crystal structures of ( $\pm$ )-**1** (PDB-Code: 1OYT, J. Olsen et al., *Angew. Chem. Int. Ed.*, 2003, **42**, 2507-2511) and ( $\pm$ )-**13** (PDB-Code: 2CF9). While the protein residues lining the S1-pocket and the catalytic centre are perfectly superimposable, a slight shift of the amino acids of the D-pocket is observed upon insertion of an isopropyl group in the P-pocket. Color code: C-skeleton of ( $\pm$ )-**1**: *green*, C-skeleton of ( $\pm$ )-**13**: *cyan*, C-skeleton of the protein in complex with ( $\pm$ )-**1**: *blue*, C-skeleton of the protein in complex with ( $\pm$ )-**13**: *grey*, O-atoms: *red*, N-atoms: *blue*, S-atom: *yellow*.

## Synthesis ESI

### 1-(4-Methoxybenzyl)pyrrole-2,5-dione (**14**)<sup>8a</sup>

General procedure A, starting from 4-methoxybenzylamine (25.0 g, 182 mmol), maleic anhydride (17.9 g, 182 mmol), DMF (0.14 cm<sup>3</sup>), oxalyl chloride (17.2 cm<sup>3</sup>, 200 mmol) and Et<sub>3</sub>N (38.4 cm<sup>3</sup>, 237 mmol) in CH<sub>2</sub>Cl<sub>2</sub> (500 cm<sup>3</sup>), gave **14** as a yellowish powder (23.8 g, 60%); mp 103–105 °C (lit.,<sup>8a</sup> 100.5–102 °C);  $\nu_{\max}/\text{cm}^{-1}$  (neat) 3097, 2948, 2840, 1733, 1698, 1610, 1513, 1470, 1438, 1406, 1385, 1348, 1339, 1303, 1292, 1244, 1176, 1147, 1106, 1040;  $\delta_{\text{H}}$ (300 MHz; CDCl<sub>3</sub>) 3.76 (3 H), 4.60 (2 H, s), 6.67 (2 H, s), 6.82, 7.27 (4 H, AA'BB', *J* 8.7);  $\delta_{\text{C}}$ (75 MHz; CDCl<sub>3</sub>) 41.1, 55.5, 114.2, 128.7, 130.1, 134.4, 159.4, 170.7; MALDI-HR-MS calcd for C<sub>12</sub>H<sub>11</sub>NNaO<sub>3</sub><sup>+</sup> ( $[M+\text{Na}]^+$ ): 240.0631; found: 240.0627.

### 1-Pyridin-4-ylmethylpyrrole-2,5-dione (**15**)<sup>8b</sup>

To a soln. of maleic anhydride (2.5 g, 25.5 mmol) in dry CH<sub>2</sub>Cl<sub>2</sub> (50 cm<sup>3</sup>) under Ar, 4-pyridylmethylamine (2.76 g, 25.5 mmol) was added dropwise and the mixture stirred for 2 h at 25 °C, before the solvent was removed in vacuo. The residue was dissolved in CH<sub>3</sub>CN (80 cm<sup>3</sup>) and Et<sub>3</sub>N (7.1 cm<sup>3</sup>, 51 mmol) and Me<sub>3</sub>SiCl (3.2 cm<sup>3</sup>, 25.5 mmol) were added. The mixture was stirred for 1 h at 80 °C, allowed to reach 25 °C, filtered through a plug of SiO<sub>2</sub> and concentrated in vacuo to give colorless crystals of **15** (2.11 g, 44%); mp 128–130 °C;  $\nu_{\max}/\text{cm}^{-1}$  (neat) 3109, 2946, 1694, 1601, 1435, 1408, 1386, 1362, 1345, 1310, 1245, 1135, 1032;  $\delta_{\text{H}}$ (300 MHz; CDCl<sub>3</sub>) 4.62 (2 H, s), 6.73 (2 H, s), 7.15, 8.50 (4 H, AA'BB', *J* 6.0);  $\delta_{\text{C}}$ (75 MHz; CDCl<sub>3</sub>) 40.1, 122.6, 134.2, 144.5, 150.1, 170.0; MALDI-HR-MS calcd for C<sub>10</sub>H<sub>9</sub>N<sub>2</sub>O<sub>2</sub><sup>+</sup> ( $[M+\text{H}]^+$ ): 189.0659; found: 189.0659.

**1-(4-Bromobenzyl)pyrrole-2,5-dione (23)**<sup>12</sup>

General procedure A, starting from 4-bromobenzylamine (2.2 g, 11.8 mmol), maleic anhydride (1.2 g, 11.8 mmol), DMF (0.01 cm<sup>3</sup>), oxalyl chloride (1.1 cm<sup>3</sup>, 13.0 mmol) and Et<sub>3</sub>N (2.5 cm<sup>3</sup>, 17.7 mmol) in CH<sub>2</sub>Cl<sub>2</sub> (40 cm<sup>3</sup>), gave **23** as a yellowish solid (2.6 g, 82%); mp 75–78 °C;  $\nu_{\max}/\text{cm}^{-1}$  (neat) 3107, 1705, 1585, 1488, 1434, 1403, 1383, 1322, 1152, 1074, 1008;  $\delta_{\text{H}}$ (300 MHz; CDCl<sub>3</sub>) 4.58 (2 H, s), 6.68 (2 H, s), 7.18, 7.38 (4 H, AA'BB', *J* 8.4);  $\delta_{\text{C}}$ (75 MHz; CDCl<sub>3</sub>) 40.6, 122.2, 130.1, 131.8, 134.1, 135.0, 170.1; EI-HR-MS calcd for C<sub>11</sub>H<sub>8</sub>BrNO<sub>2</sub><sup>+</sup> (*M*<sup>+</sup>): 264.9733; found: 264.9735.

**1-(4-Chlorobenzyl)-pyrrole-2,5-dione (37)**

General procedure A, starting from 4-chlorobenzylamine (5.0 g, 35 mmol), maleic anhydride (3.4 g, 35 mmol), DMF (0.02 cm<sup>3</sup>), oxalyl chloride (3.4 cm<sup>3</sup>, 39 mmol) and Et<sub>3</sub>N (7.3 cm<sup>3</sup>, 53 mmol) in CH<sub>2</sub>Cl<sub>2</sub> (80 cm<sup>3</sup>), gave **37** as a yellowish solid (6.4 g, 82%); mp 79–81 °C;  $\nu_{\max}/\text{cm}^{-1}$  (neat) 3101, 1698, 1491, 1438, 1404, 1390, 1363, 1325, 1154, 1088, 1015;  $\delta_{\text{H}}$ (300 MHz; CDCl<sub>3</sub>) 4.61 (2 H, s), 6.69 (2 H, s), 7.26–7.30 (4 H, m);  $\delta_{\text{C}}$ (75 MHz; CDCl<sub>3</sub>) 40.7, 128.7, 128.8, 129.7, 130.2, 134.1, 170.0; EI-HR-MS calcd for C<sub>11</sub>H<sub>8</sub>ClNO<sub>2</sub><sup>+</sup> (*M*<sup>+</sup>): 221.0239; found: 221.0241.
